# Supplementary material for: On stereocomplexed polylactide materials as support for PAMAM dendrimers: synthesis and properties
Source: Royal Society of Chemistry journal article supplement (doi:10.1039/c5ra05295e), 2015-01-01
Supplement: c5ra05295e1.pdf [file c5ra05295e1.pdf]

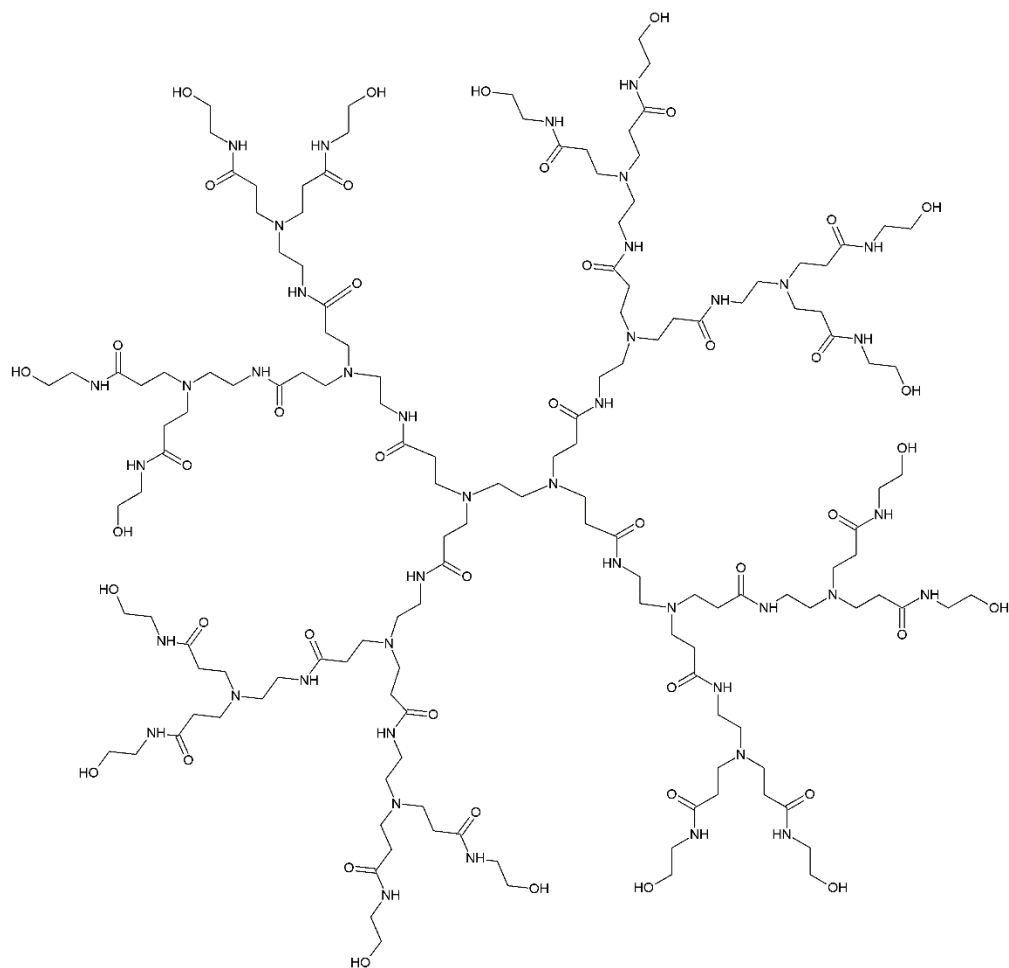

**Figure 1S.** Structure of generation 2 PAMAM dendrimer with 16 terminal hydroxyl groups (PAMAM-OH or PAMAM).

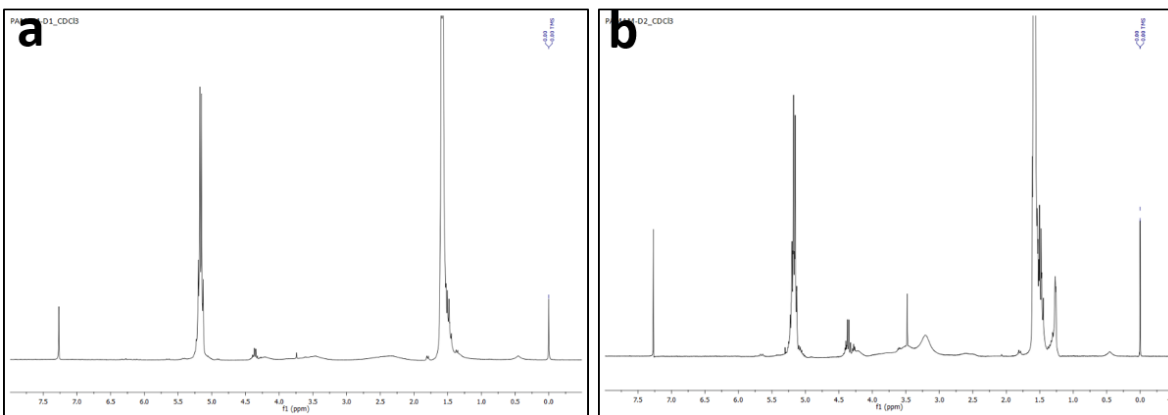

**Figure 2S.** <sup>1</sup>H NMR spectra (δ -0.5-8.0 ppm) of samples PAMAM-D1 (a) and PAMAM-D2 (b).

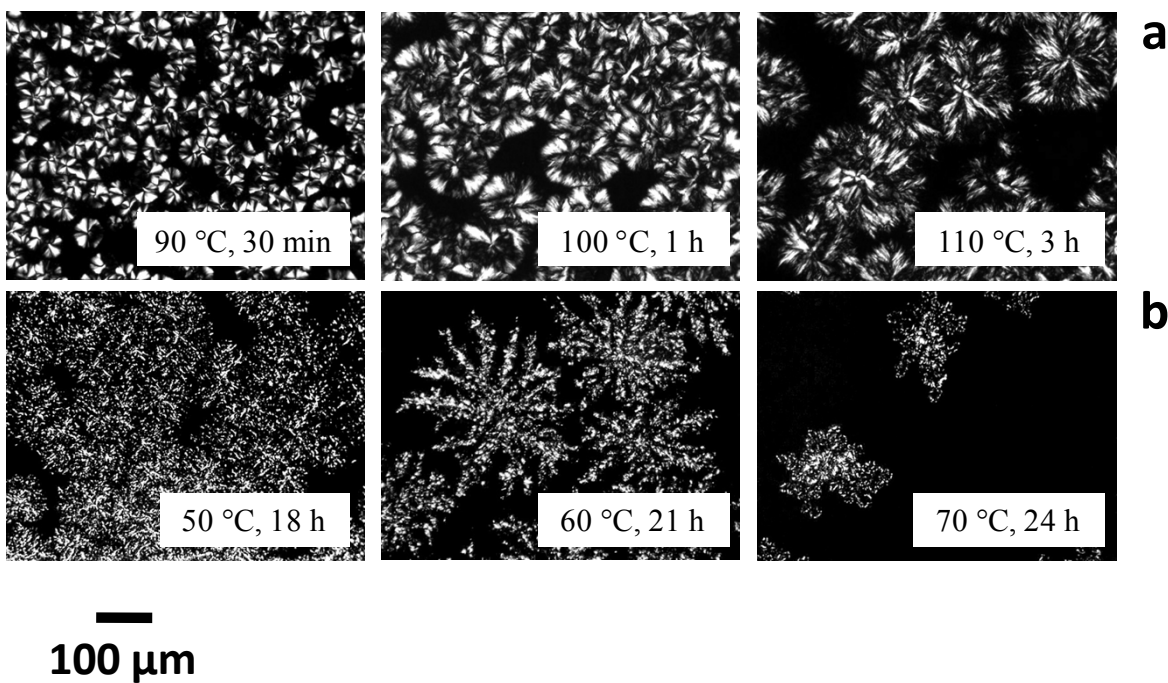

**Figure 3S.** Optical micrograph of the samples PAMAM-D1 (a) and PAMAM-D2 (b) isothermally crystallized from the melt at the indicated temperatures for the indicated times.

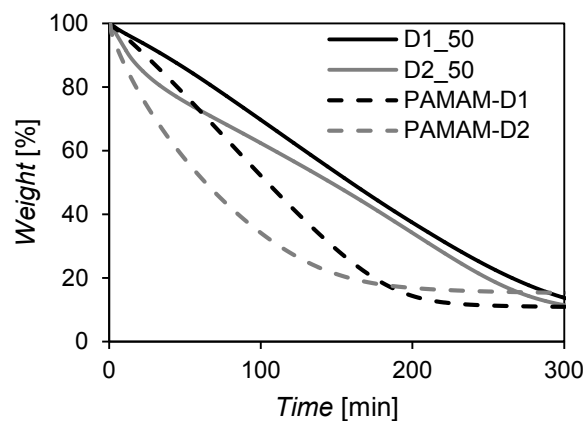

**Figure 4S.** TGA curves of the equimolar PAMAM-D/PLLA blend films (D1\_50 and D2\_50), compared to those of the neat PAMAM-D samples, recorded on isothermal holding at 200 °C.

**Table 1S.** Results of the water absorption test (after 48 h of immersion in water at room temperature) for (100 μm in thickness, 2.25 cm<sup>2</sup> in area) film specimens; the data are the average of four replicates.

| Sample                                | PAMAM content [%] | Water absorption <sup>a</sup> [%; ±2] | Weight loss <sup>b</sup> [%; ±1] |
|---------------------------------------|-------------------|---------------------------------------|----------------------------------|
| L <sub>100K</sub>                     | 0                 | 0                                     | none                             |
| L <sub>100K</sub> / D <sub>100K</sub> | 0                 | 0                                     | none                             |
| D1_5                                  | 0.55              | 0                                     | none                             |
| D1_25                                 | 2.75              | 0                                     | none                             |
| D1_50                                 | 5.5               | 18                                    | none                             |
| D2_5                                  | 0.8               | 0                                     | none                             |
| D2_50                                 | 8                 | 21 <sup>c</sup>                       | 9                                |

<sup>a</sup> Percentage of water absorbed during immersion, calculated according to equation (1). <sup>b</sup> Percentage of matter lost during immersion, calculated according to equation (2). <sup>c</sup> Water-absorption value calculated as the sum of the values from equations (1) and (2).
